# Supplementary material
Source: publisher figshare collection journal article supplement (https://karger.figshare.com/ndownloader/files/10415943)
Supplement: Supplementary file 1 [file 10415943]

Supplementary data

Definition of statin in the INPULSIS® trials

- From the Anatomical Therapeutic Chemical 3 class “lipid modifying agents, combinations”, the preferred terms:
  - Inegy® (simvastatin and ezetimibe)
  - Caduet® (amlodipine besylate and atorvastatin calcium)
  - PRAVIGARD™ (buffered aspirin and pravastatin sodium)
  - Amlodipine with atorvastatin
- From the Anatomical Therapeutic Chemical 3 class “lipid modifying agents, plain”, the preferred terms:
  - Simvastatin
  - Atorvastatin calcium
  - Rosuvastatin calcium
  - Pravastatin sodium
  - Pravastatin
  - Atorvastatin
  - Fluvastatin sodium
  - Lovastatin
  - Pitavastatin calcium
  - Rosuvastatin
  - Fluvastatin.

Further information on the Anatomical Therapeutic Chemical classification system can be found here: https://www.whocc.no/atc/structure_and_principles.
